# Supplementary material
Source: HighWire-hosted journal article supplement (https://www.cancerbiomed.org/content/19/10/1503)
Supplement: media-1 [file media-1.pdf]

# Supplementary materials

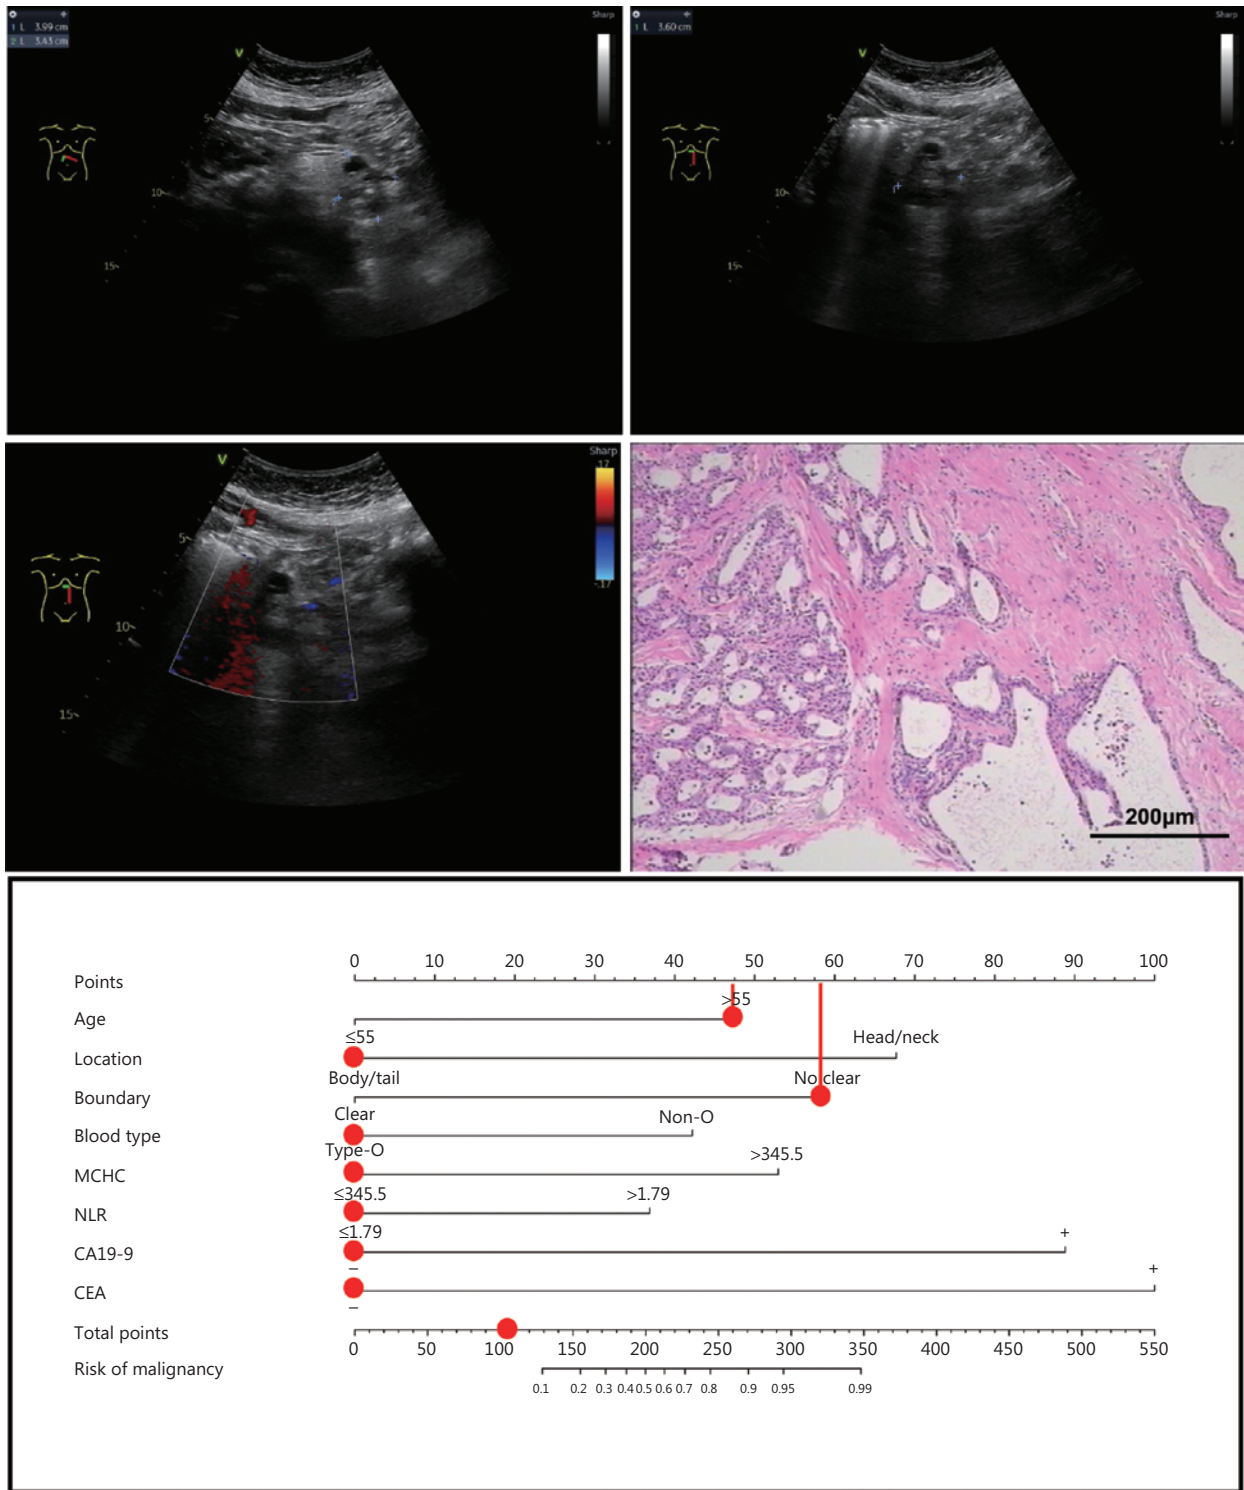

**Figure S1** Female, 59 years old; ultrasound shows a cystic mass in the tail of the pancreas with poorly defined, irregular borders, and strong central echogenic calcification. O type blood, CA19-9: 11.53 U/ml, CEA: 1.47 μg/L, MCHC: 334 g/L, NLR: 1.57. The model suggested benignity, and the postoperative pathology indicated SCN.

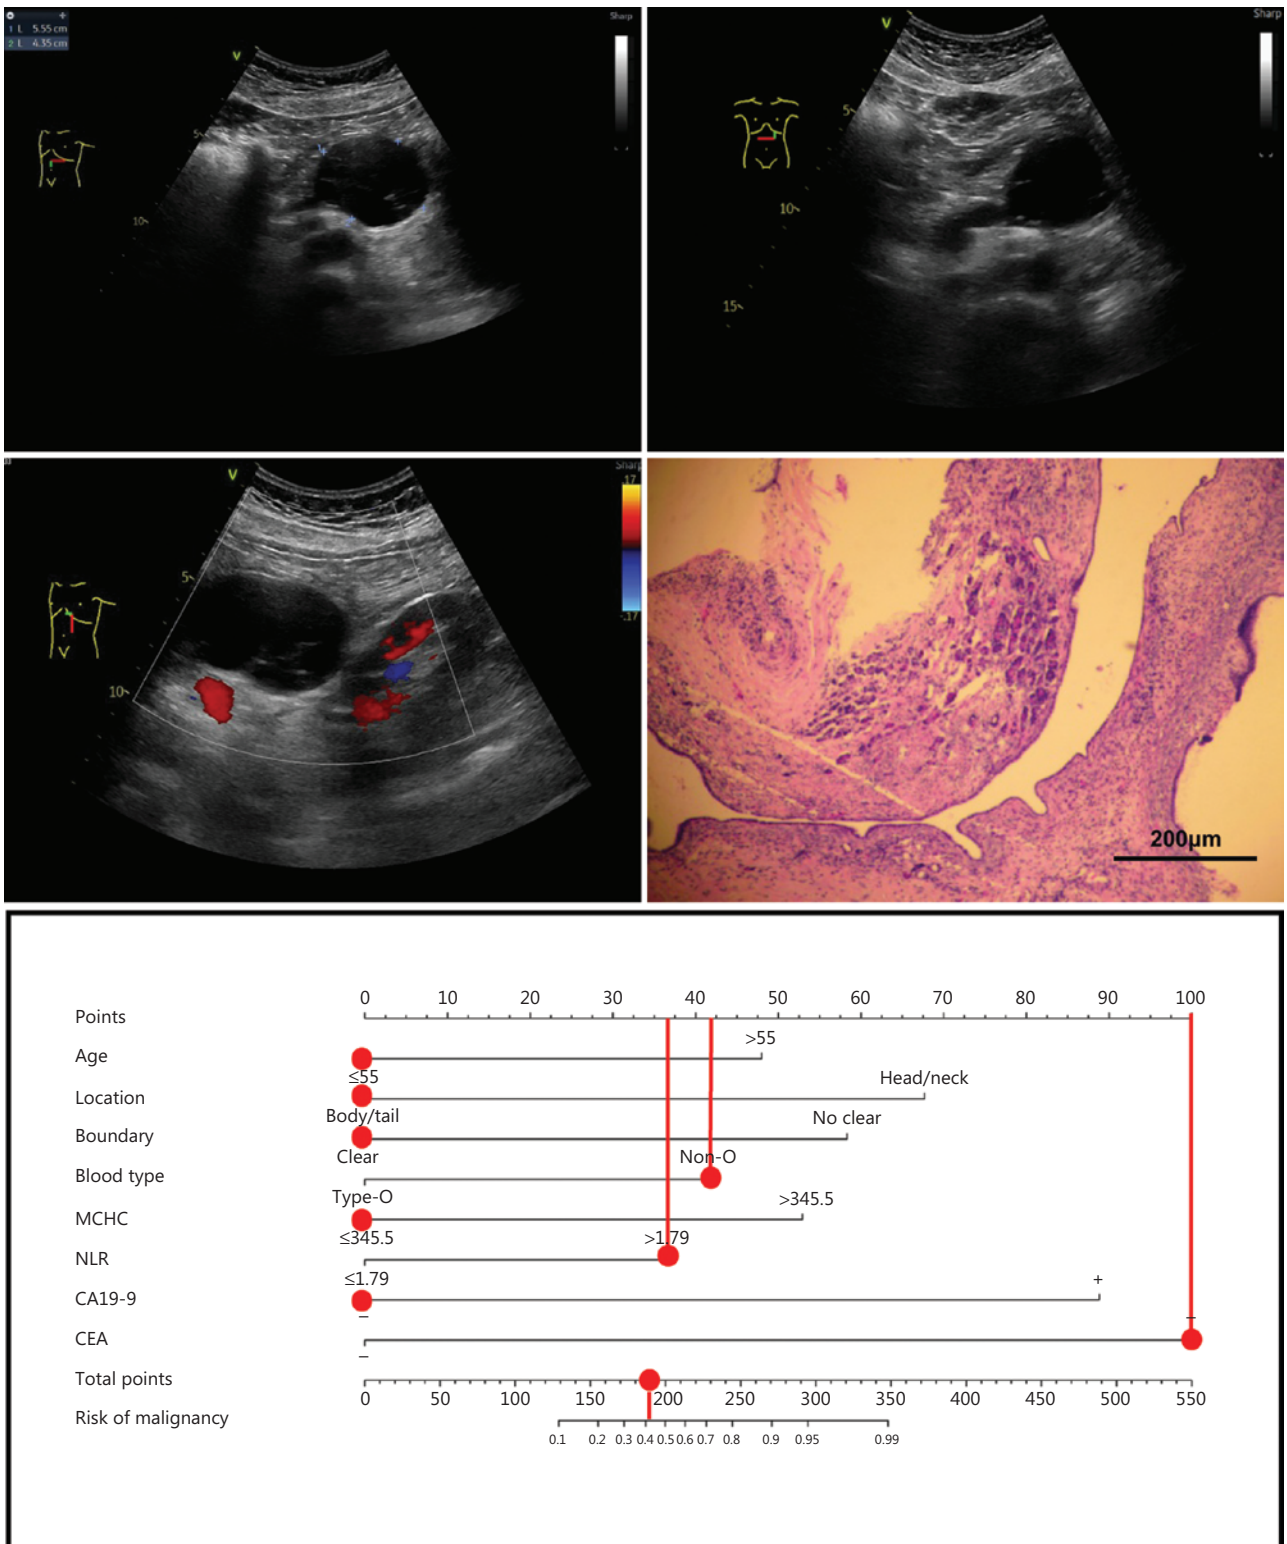

**Figure S2** Female, 40 years old; ultrasound shows a cystic mass in the body and tail of the pancreas with clear borders, regular morphology, visible multiple fibrous separations, and no significant dilatation of the pancreatic duct. A type blood, MCHC: 341 g/L, NLR: 3.05, CA19-9: 24.19 U/ml, CEA: 10.53 µg/L. The model suggested benignity, and the postoperative pathology indicated MCN.

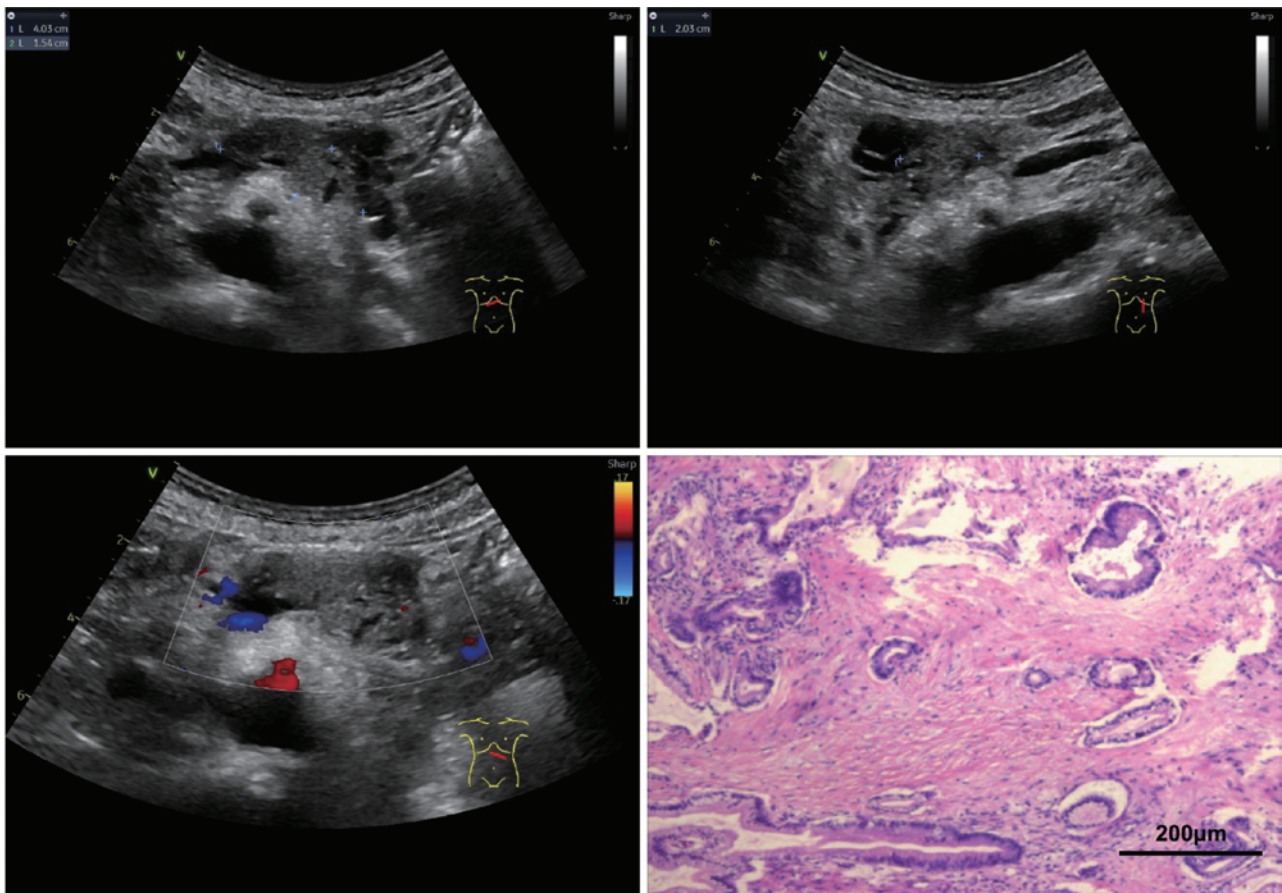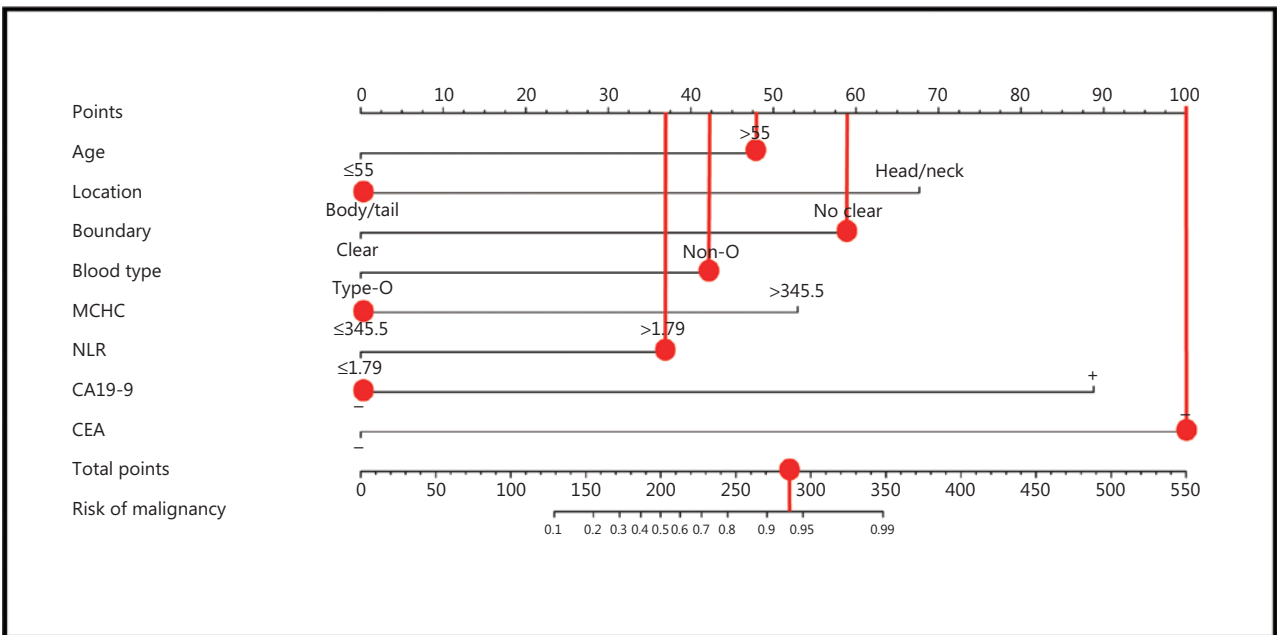

**Figure S3** Female, 63 years old; ultrasound shows a middle-low echo reflection area with poorly defined, irregular, and heterogeneous echogenicity in the pancreatic duct located in the tail and body of the pancreas. A type blood, CA19-9: 7.13 U/ml, CEA: 9.50 μg/L, MCHC: 331 g/L, NLR: 2.17. The model suggested malignancy, and the postoperative pathology indicated IPMN with associated invasive carcinoma.

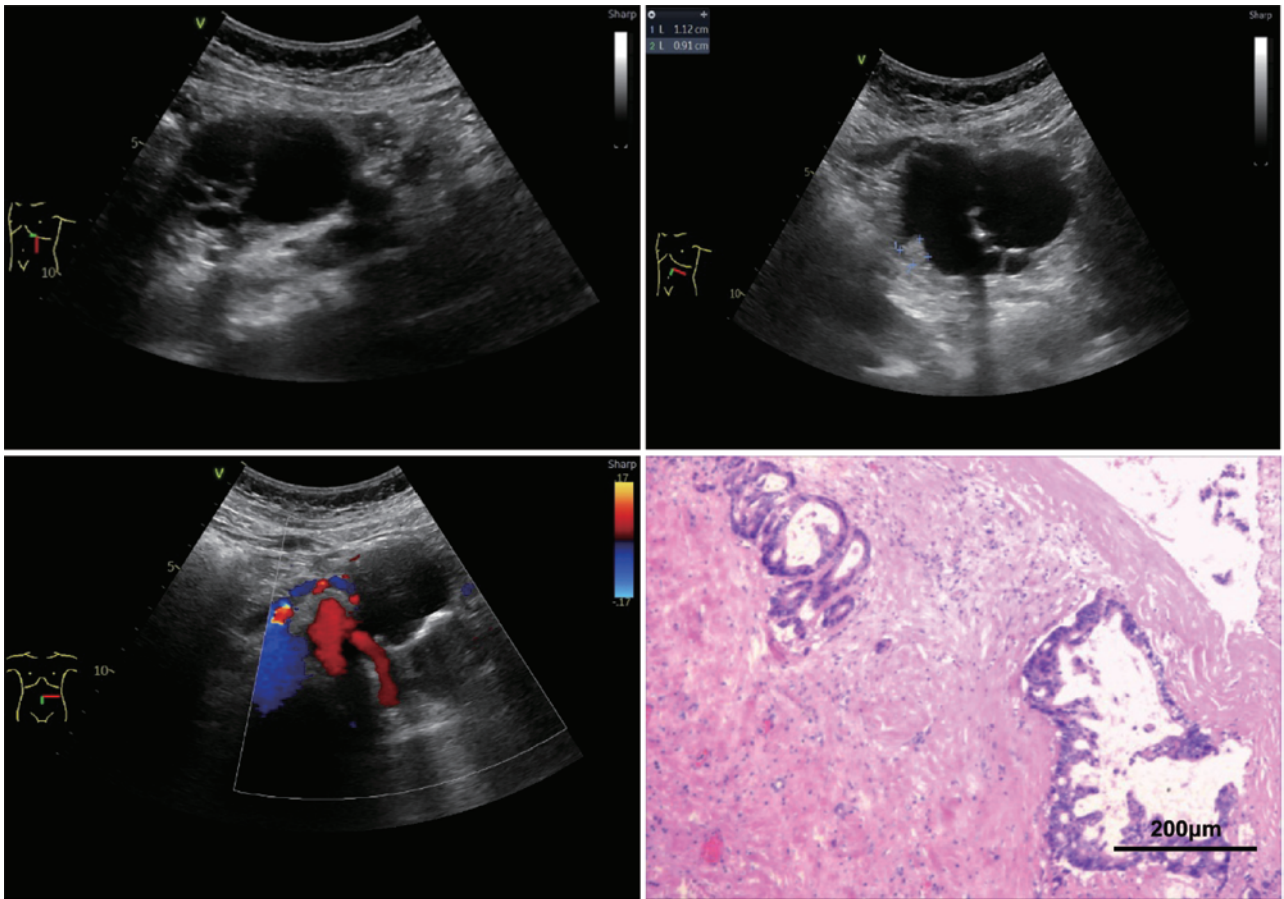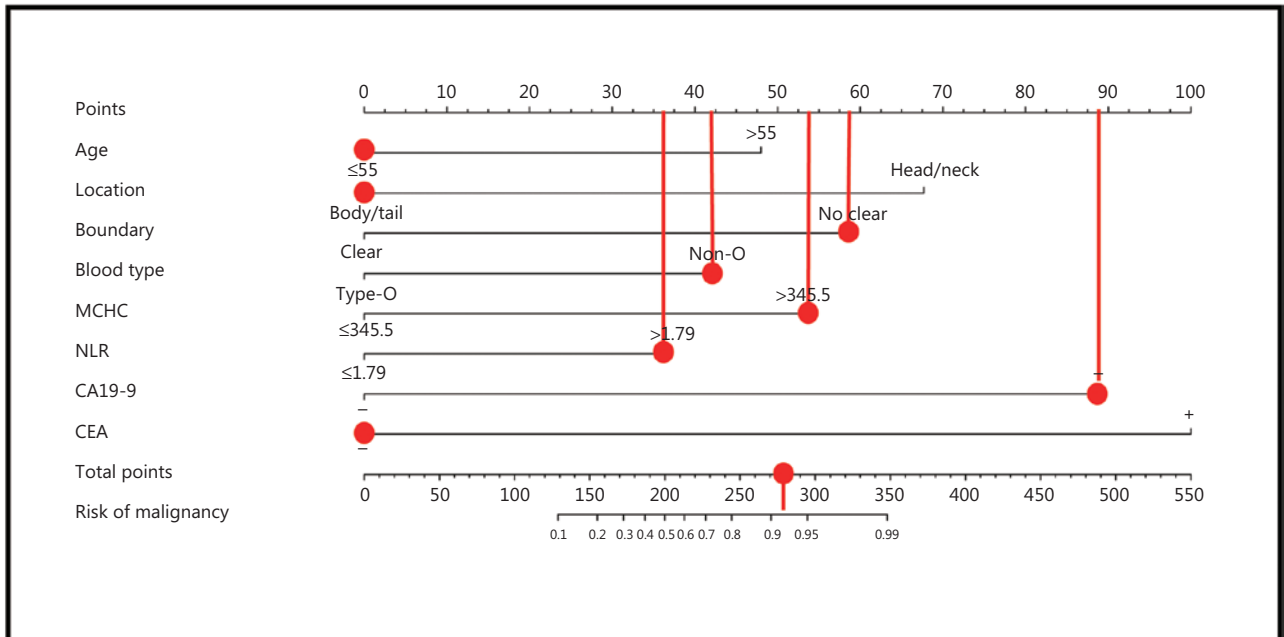

**Figure S4** Female, 50 years old; ultrasound showed a cystic mass in the body and tail of the pancreas with an unclear border, irregular morphology, thick local cystic wall, and mural nodule with multiple strong echogenic separations and calcifications. B type blood, MCHC: 353 g/L, NLR: 2.98, CA19-9: 313.9 U/ml, CEA: 2.44 µg/L. The model suggested malignancy, and the postoperative pathology indicated moderately differentiated ductal adenocarcinoma with mucinous adenocarcinoma.
